# Supplementary material for: Low-chromophore lignin isolation from natural biomass with polyol-based deep eutectic solvents
Source: Royal Society of Chemistry journal article supplement (doi:10.1039/d4gc01824a), 2024-01-01
Supplement: d4gc01824a1.pdf [file d4gc01824a1.pdf]

## Supplementing information for:

### Low-chromophore lignin isolation from natural biomass with polyol-based deep eutectic solvents

Jinyuan Cheng<sup>a,b</sup>, Xuelian Zhou<sup>a</sup>, Caoxing Huang<sup>b</sup>, Chang Geun Yoo<sup>f</sup>, Xianzhi Meng<sup>c</sup>, Guigan Fang<sup>a,b,\*</sup>, Arthur J. Ragauskas<sup>c,d,e</sup>, Chen Huang<sup>a,b,\*</sup>

<sup>a</sup>Institute of Chemical Industry of Forest Products, Chinese Academy of Forestry, Jiangsu Province Key Laboratory of Biomass Energy and Materials, Nanjing 210042, China.

<sup>b</sup>Co-Innovation Center for Efficient Processing and Utilization of Forest Resources, Nanjing Forestry University, Nanjing 210037, China.

<sup>c</sup>Department of Chemical and Biomolecular Engineering, University of Tennessee Knoxville, Knoxville, TN 37996, USA.

<sup>d</sup>Department of Forestry, Wildlife, and Fisheries, Center for Renewable Carbon, The University of Tennessee Institute of Agriculture, Knoxville, TN 37996, USA.

<sup>e</sup>Joint Institute for Biological Science, Biosciences Division, Oak Ridge National Laboratory, Oak Ridge, TN 37831, USA.

<sup>f</sup>Department of Paper and Bioprocess Engineering, State University of New York College of Environmental Science and Forestry, Syracuse, New York 13210-2781, United States.

\*Correspondence authors. Email: [huangchen3127@njfu.edu.cn](mailto:huangchen3127@njfu.edu.cn), [fangguigan@icifp.cn](mailto:fangguigan@icifp.cn), or [aragausk@utk.edu](mailto:aragausk@utk.edu)

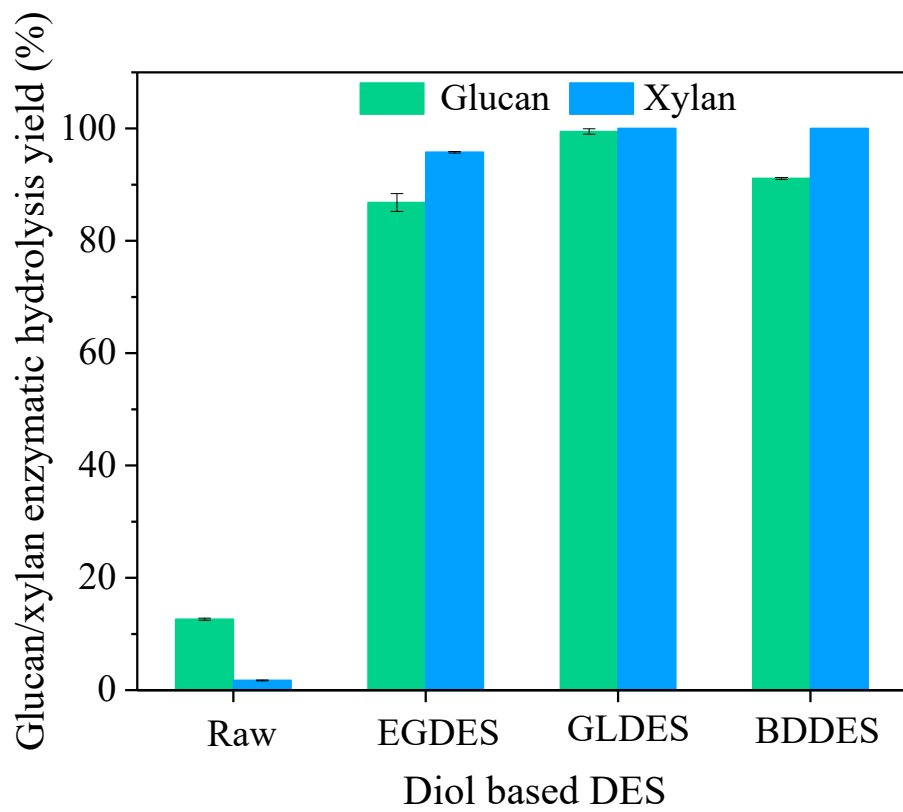

**Fig. S1.** The glucan and xylan enzymatic hydrolysis yield after different PA-DESs pretreatment at 110 °C for 1 h.

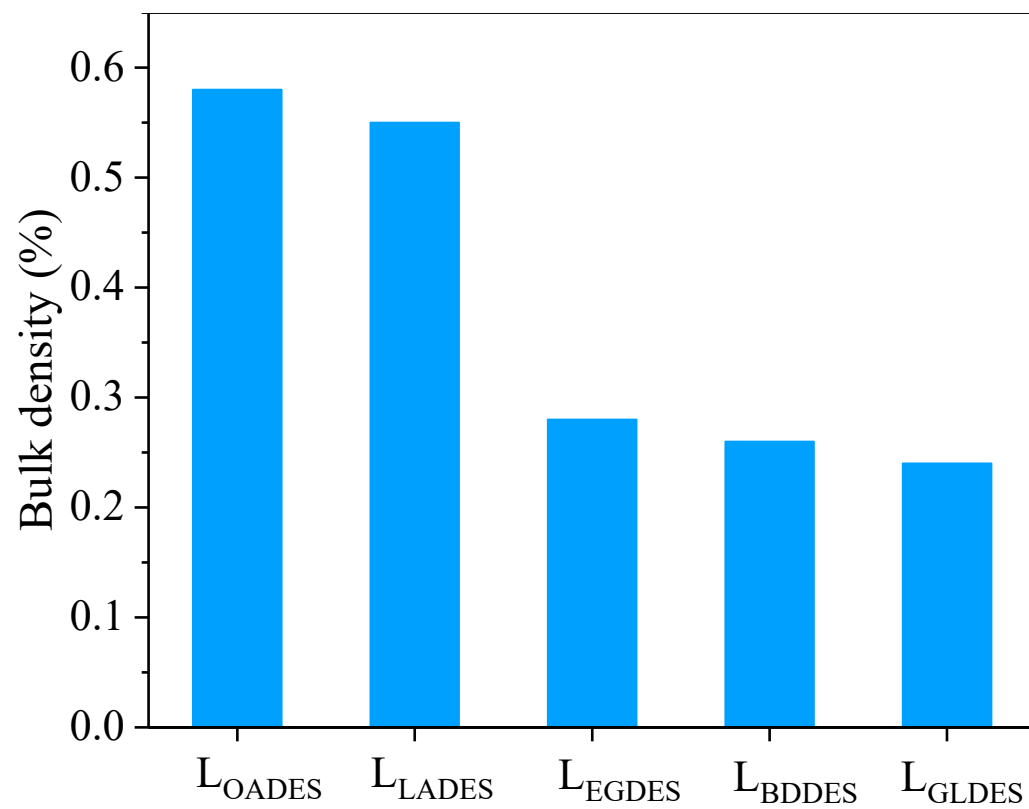

**Fig. S2.** Bulk density of the recovered lignins.

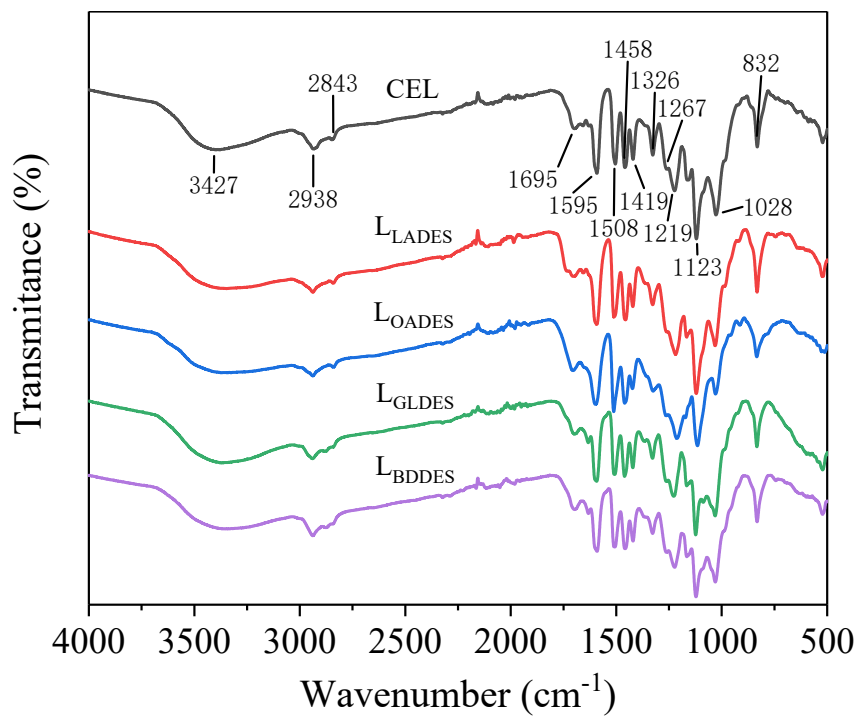

**Fig. S3.** FTIR analysis of the CEL and recovered lignins.

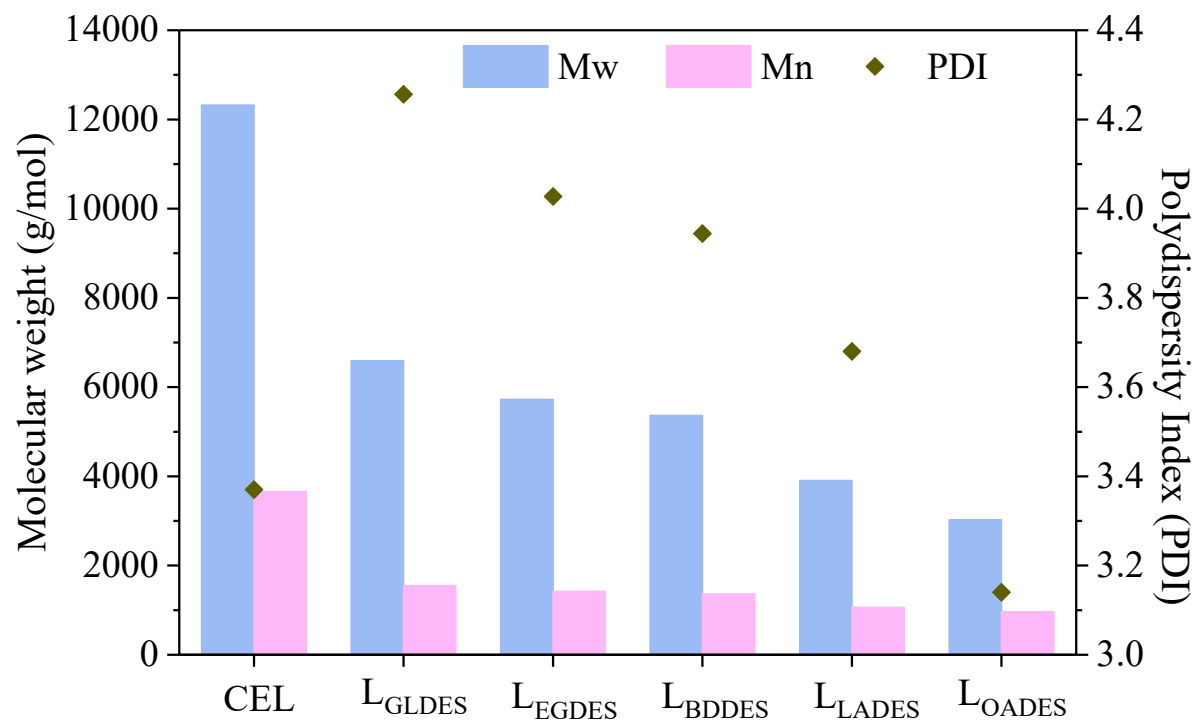

**Fig. S4.** Molecular weight determination of CEL and the isolated lignins.

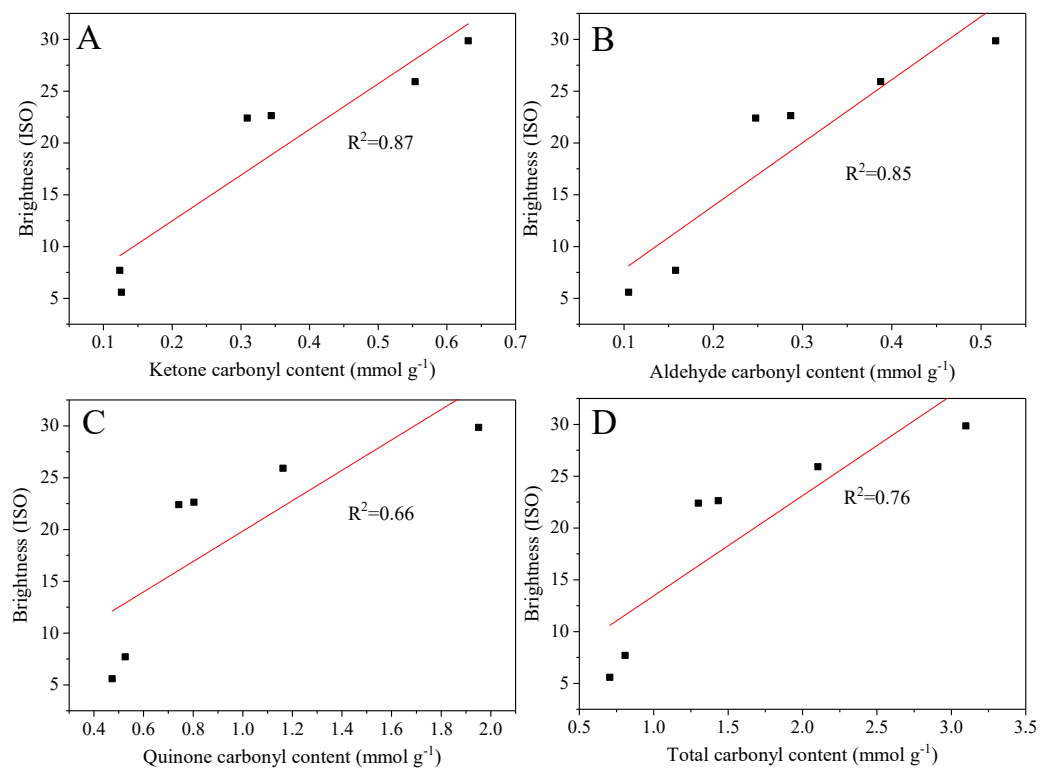

**Fig. S5.** The linear fittings between brightness of lignin and carbonyl contents of ketone (A), aldehyde (B), quinone (C) and total carbonyl (D).

**Table S1.** Viscosity of different PA-DESs under different temperatures.

| DES   | Viscosity (mPa·s) |       |       |        |
|-------|-------------------|-------|-------|--------|
|       | 30 °C             | 60 °C | 90 °C | 110 °C |
| CEGAT | 60                | 20    | 9     | 7      |
| CGLAT | 110               | 75    | 12    | 8      |
| CBDAT | 108               | 75    | 11    | 7      |

**Table S2.** The solvatochromic parameters of DESs.

| DES    | $\pi^*$ | $\alpha$ | $\beta$ | $\alpha-\beta$ |
|--------|---------|----------|---------|----------------|
| EGDES  | 1.409   | 1.812    | -5.567  | 7.379          |
| GLDES  | 1.417   | 1.815    | -5.694  | 7.507          |
| BDDDES | 1.433   | 1.832    | -6.460  | 8.293          |



**Table S3.** Recovery yield and polysaccharides content of recovered lignin.

| PA-DES              | Lignin recovery (%) | Glucose (%) | Xylose (%) | Arabinose (%) |
|---------------------|---------------------|-------------|------------|---------------|
| L <sub>EGDES</sub>  | 96.54               | 0           | 0.03       | 0             |
| L <sub>GLDES</sub>  | 97.36               | 0           | 0          | 0.08          |
| L <sub>BDDDES</sub> | 94.62               | 0.02        | 0.16       | 0             |
| L <sub>LADES</sub>  | 79.65               | 0           | 0.02       | 0             |
| L <sub>OADES</sub>  | 75.68               | 0.11        | 0.03       | 0             |

**Table S4.** The elemental analysis of the CEL and isolated DES lignin.

| Samples             | N (%) | C (%) | H (%) | S (%) |
|---------------------|-------|-------|-------|-------|
| CEL                 | 0.29  | 59.04 | 5.69  | 0     |
| L <sub>LADES</sub>  | 0.65  | 59.04 | 5.351 | 0     |
| L <sub>OADES</sub>  | 0.5   | 60.64 | 4.943 | 0     |
| L <sub>GLDES</sub>  | 0.58  | 54.72 | 5.72  | 0     |
| L <sub>BDDDES</sub> | 0.49  | 59.03 | 5.678 | 0     |

**Table S5.** Quantification of CEL and regenerated lignin under different PA-DES pretreatment systems.

| Sample             | $\beta$ - $\beta$ (%) | $\beta$ -5 (%) | FA (%) | PCE (%) | H     |
|--------------------|-----------------------|----------------|--------|---------|-------|
| CEL                | 4.11                  | 5.44           | 6.12   | 25.14   | 10.79 |
| L <sub>EGDES</sub> | 3.29                  | 4.95           | 0      | 27.47   | 6.78  |
| L <sub>GLDES</sub> | 3.65                  | 5.11           | 0      | 26.97   | 7.50  |
| L <sub>BDES</sub>  | 3.24                  | 4.91           | 0      | 25.56   | 5.67  |
| L <sub>LADES</sub> | 2.46                  | 4.21           | 0      | 22.36   | 7.37  |
| L <sub>OADES</sub> | 0                     | 0              | 0      | 11.44   | 17.67 |
